# Supplementary material
Source: PubMed Central journal article supplement (PMC1838635)
Supplement: pnas_0607620104_1.pdf [file pnas_0607620104_1.pdf]

| HcB24xC3H         | D7Mit270 | D7Dys1  | D7Dys2  | D7Dys11                 | D7Mit229 | D7Dys5  | D7Dys6  | D7Dys26 | D7Dys7  | D7Dys3  | D7Dys4  | D7Mit193 | D7Mit82 | DCC      | DCC       |
|-------------------|----------|---------|---------|-------------------------|----------|---------|---------|---------|---------|---------|---------|----------|---------|----------|-----------|
| Progeny           | 34.14Mb  | 38.51Mb | 39.17Mb | 39.56Mb                 | 39.77Mb  | 40.30Mb | 40.32Mb | 40.40Mb | 41.02Mb | 41.87Mb | 43.07Mb | 43.86Mb  | 45.71Mb | Scores   | Phenotype |
| 1                 | □        | ■       | ■       | ■                       | ■        | ■       | ■       | ■       | ■       | ■       | ■       | ■        | ■       | 1 of 59  | R         |
| 2                 | □        | □       | ■       | ■                       | ■        | ■       | ■       | ■       | ■       | ■       | ■       | ■        | ■       | 0 of 84  | R         |
| 3                 | □        | □       | □       | □                       | ■        | ■       | ■       | ■       | ■       | ■       | ■       | ■        | ■       | 3 of 108 | R         |
| 4                 | □        | □       | □       | □                       | ■        | ■       | ■       | ■       | ■       | ■       | ■       | ■        | ■       | 0 of 64  | R         |
| 5                 | □        | □       | □       | □                       | ■        | ■       | ■       | ■       | ■       | ■       | ■       | ■        | ■       | 0 of 84  | R         |
| 6                 | □        | □       | □       | □                       | ■        | ■       | ■       | ■       | ■       | ■       | ■       | ■        | ■       | 0 of 84  | R         |
| 7                 | □        | □       | □       | □                       | ■        | ■       | ■       | ■       | ■       | ■       | ■       | ■        | ■       | 0 of 96  | R         |
| 8                 | □        | □       | □       | □                       | □        | □       | □       | □       | □       | □       | ■       | ■        | ■       | 17 of 84 | S         |
| 9                 | □        | □       | □       | □                       | □        | □       | □       | □       | □       | □       | ■       | ■        | ■       | 18 of 84 | S         |
| 10                | □        | □       | □       | □                       | □        | □       | □       | □       | □       | □       | □       | ■        | ■       | 20 of 60 | S         |
| 11                | ■        | ■       | ■       | ■                       | ■        | ■       | ■       | □       | □       | □       | □       | □        | □       | 0 of 108 | R         |
| 12                | ■        | ■       | ■       | ■                       | ■        | ■       | ■       | ■       | □       | □       | □       | □        | □       | 0 of 84  | R         |
| 13                | ■        | ■       | ■       | ■                       | ■        | ■       | ■       | ■       | □       | □       | □       | □        | □       | 0 of 84  | R         |
| 14                | ■        | ■       | ■       | ■                       | ■        | ■       | ■       | ■       | □       | □       | □       | □        | □       | 4 of 96  | R         |
| 15                | ■        | ■       | ■       | ■                       | ■        | ■       | ■       | ■       | □       | □       | □       | □        | □       | 0 of 84  | R         |
| 16                | ■        | ■       | ■       | ■                       | ■        | ■       | ■       | ■       | ■       | □       | □       | □        | □       | 0 of 48  | R         |
| 17                | ■        | ■       | ■       | ■                       | ■        | ■       | ■       | ■       | ■       | ■       | □       | □        | □       | 0 of 84  | R         |
| 18                | ■        | ■       | ■       | ■                       | ■        | ■       | ■       | ■       | ■       | ■       | □       | □        | □       | 1 of 84  | R         |
| 19                | ■        | ■       | ■       | ■                       | ■        | ■       | ■       | ■       | ■       | ■       | □       | □        | □       | 0 of 84  | R         |
| 20                | ■        | ■       | ■       | ■                       | ■        | ■       | ■       | ■       | ■       | ■       | □       | □        | □       | 1 of 96  | R         |
| 21                | ■        | ■       | ■       | ■                       | ■        | ■       | ■       | ■       | ■       | ■       | □       | □        | □       | 1 of 84  | R         |
| 22                | ■        | ■       | ■       | ■                       | ■        | ■       | ■       | ■       | ■       | ■       | □       | □        | □       | 3 of 72  | R         |
| 23                | ■        | ■       | ■       | ■                       | ■        | ■       | ■       | ■       | ■       | ■       | ■       | ■        | □       | 1 of 60  | R         |
| <b>QTL region</b> |          |         |         | <i>Dyscalc1</i> (840kb) |          |         |         |         |         |         |         |          |         |          |           |
