# Supplementary material
Source: PubMed Central journal article supplement (PMC1838635)
Supplement: pnas_0607620104_7.pdf [file pnas_0607620104_7.pdf]

**Table 1. Summary of genes exhibiting *cis*-controlled expression QTL in multiple tissues in the BxH intercross**

| Primary tissue | No. of active genes<br>( <i>cis</i> -eQTL lod > 4.3) | Second Tissue | No. of active<br>genes (N*) | No. of genes (M <sub>1</sub> <sup>†</sup> )<br>( <i>cis</i> -eQTL lod > 4.3) | Percentage of detection<br>100*M <sub>1</sub> /N (%) | No. of genes (M <sub>2</sub> <sup>‡</sup> )<br>( <i>cis</i> -eQTL lod > 2.0) | Percentage of detection<br>100*M <sub>2</sub> /N (%) |
|----------------|------------------------------------------------------|---------------|-----------------------------|------------------------------------------------------------------------------|------------------------------------------------------|------------------------------------------------------------------------------|------------------------------------------------------|
| Liver          | 1,865                                                | Adipose       | 1,726                       | 877                                                                          | 50.81                                                | 1,047                                                                        | 60.66                                                |
|                |                                                      | Brain         | 1,062                       | 859                                                                          | 80.89                                                | 910                                                                          | 85.69                                                |
|                |                                                      | Muscle        | 1,272                       | 827                                                                          | 65.02                                                | 927                                                                          | 72.88                                                |
| Adipose        | 1,491                                                | Liver         | 1,166                       | 868                                                                          | 74.44                                                | 953                                                                          | 81.73                                                |
|                |                                                      | Brain         | 1,019                       | 869                                                                          | 85.28                                                | 903                                                                          | 88.62                                                |
|                |                                                      | Muscle        | 1,168                       | 885                                                                          | 75.77                                                | 958                                                                          | 82.02                                                |
| Brain          | 1,754                                                | Liver         | 1,281                       | 859                                                                          | 67.06                                                | 968                                                                          | 75.57                                                |
|                |                                                      | Adipose       | 1,627                       | 869                                                                          | 53.41                                                | 1,038                                                                        | 63.80                                                |
|                |                                                      | Muscle        | 1,296                       | 928                                                                          | 71.60                                                | 1,017                                                                        | 78.47                                                |
| Muscle         | 1,584                                                | Liver         | 1,218                       | 827                                                                          | 67.90                                                | 945                                                                          | 77.59                                                |
|                |                                                      | Adipose       | 1,486                       | 885                                                                          | 59.56                                                | 1,027                                                                        | 69.11                                                |
|                |                                                      | Brain         | 1,105                       | 928                                                                          | 83.98                                                | 970                                                                          | 87.78                                                |

This study is designed to estimate the probability of detecting a *cis*-eQTL in a second tissue after it has been detected in a primary tissue. The number of genes actively expressed and *cis*-eQTL detected across multiple tissues are summarized. Whether a gene with a *cis*-eQTL in one tissue can be also detected with a *cis*-eQTL in another tissue will depend on (i) whether the gene is expressed in the second tissue, and (ii) whether the *cis*-regulation also occurs in the second tissue. To select a list of actively expressed genes in

a particular tissue, we adopted a vigorous selection procedure (1). We then estimated the percentage of these genes demonstrating significant *cis*-eQTL. We defined a significant *cis*-eQTL as having a lod score  $> 4.3$  where the eQTL mapped within 20-Mb of the physical location of the gene. The results show a range from 53% to 85% for the pair-wise comparisons among the four tissues, suggesting 53-85% of the significant *cis*-eQTL can be detected in two tissues. We then estimated the probability of detecting the *cis*-eQTL in a second tissue with a reduced threshold (lod score  $> 2.0$ ). The power to detect a *cis*-eQTL in an independent experiment (second tissue) that was detected in a first experiment (primary tissue) with a lod score  $> 4.3$  is estimated to be  $> 99\%$  at a lod score threshold of 2.0 (follows from application of standard power calculation for point-wise, simple linear regression method). The percentage of *cis*-eQTL that can be detected for genes expressed in the second tissue is now calculated to be 63-88%. Overall, our data suggest that, for a gene exhibiting significant *cis*-eQTL in one tissue, it is likely that it also exhibits *cis*-regulation in another tissue if it is actively expressed in that tissue. \*N, the number of actively expressed genes; <sup>†</sup>M<sub>1</sub>, the number of genes with *cis*-eQTL lod  $> 4.3$ ; <sup>‡</sup>M<sub>2</sub>, the number of genes with *cis*-eQTL lod  $> 2.0$ .

1. Yang X, Schadt EE, Wang S, Wang H, Arnold AP, Ingram-Drake L, Drake TA, Lusis AJ (2006) *Genome Res.* 16: 995-1004.
