# Supplementary material
Source: PubMed Central journal article supplement (PMC1838635)
Supplement: pnas_0607620104_8.pdf [file pnas_0607620104_8.pdf]

**Table 2.** Identification of *Abcc6* as the candidate gene for *Dyscalcl* using *cis*-eQTL analysis

| Symbol               | Description                                             | B6.apoE <sup>-/-</sup> vs. C3H.apoE <sup>-/-</sup> |                   | <i>cis</i> -eQTL lod score |             |
|----------------------|---------------------------------------------------------|----------------------------------------------------|-------------------|----------------------------|-------------|
|                      |                                                         | P(Wilcoxon)                                        | P(t test)         | BxH.apoE <sup>-/-</sup>    | BxD         |
| <i>Nucb1</i> *       | Nucleobindin 1                                          | 2.22E-05                                           | <0.0001           | 3.9                        | NS          |
| <i>Tulp2</i>         | Tubby-like protein 2                                    | NS                                                 | NS                | NS                         | NS          |
| <i>Myd116</i>        | Myeloid differentiation primary response gene 116       | 0.0125                                             | 0.0102            | NS                         | NS          |
| <i>Plekha4</i> *     | Pleckstrin domain-containing protein family A member 4  | 8.71E-09                                           | <0.0001           | 8.7†                       | n/a         |
| <i>Dhrs10</i>        | Dehydrogenase/reductase (SDR family) member 10          | NS                                                 | 0.0201            | 2.3                        | n/a         |
| <i>Bcat2</i>         | Branched-chain amino acid aminotransferase              | n/a                                                | n/a               | n/a                        | n/a         |
| <i>Fgf21</i> *       | Fibroblast growth factor-21                             | 1.31E-07                                           | <0.0001           | 6.8†                       | NS          |
| <i>Fut1</i>          | Fucosyltransferase 1                                    | NS                                                 | NS                | NS                         | NS          |
| <i>Izumo1</i>        | Izumo sperm-egg fusion 1                                | NS                                                 | NS                | NS                         | NS          |
| <i>Rasip1</i>        | Ras-interacting protein 1                               | 0.0155                                             | 0.012             | 3.0                        | NS          |
| 5430432N15Rik*       | Riken cDNA 5430432N15 gene                              | 7.80E-10                                           | <0.0001           | 17.6†                      | NS          |
| <i>Fut2</i> *        | Fucosyltransferase 2                                    | 8.03E-05                                           | <0.0001           | NS                         | 2.8         |
| <i>Sec1</i>          | Secretory blood group 1                                 | NS                                                 | NS                | NS                         | NS          |
| <i>Ensmusg59749</i>  | NP_665806 peptide                                       | n/a                                                | n/a               | n/a                        | n/a         |
| <i>Car11</i> *       | Carbonic anhydrase 11                                   | 2.88E-23                                           | <0.0001           | 56.5†                      | NS          |
| <i>Dbp</i>           | D site albumin promoter binding protein                 | NS                                                 | NS                | NS                         | NS          |
| <i>Sphk2</i> *       | Sphingosine kinase 2                                    | 1.37E-17                                           | <0.0001           | NS                         | 18.5†       |
| <i>Ensmusg59070</i>  | n/a                                                     | n/a                                                | n/a               | n/a                        | n/a         |
| 4930403C10Rik        | Riken cDNA 4930403C10 gene                              | NS                                                 | NS                | NS                         | NS          |
| <i>Spaca4</i>        | Sperm acrosome associated 4                             | NS                                                 | NS                | NS                         | NS          |
| <i>Sult2b1</i>       | Sulfotransferase family, cytosolic, 2B, member 1        | NS                                                 | NS                | 4.5†                       | NS          |
| <i>Lmtk3</i>         | Lemur tyrosine kinase 3                                 | NS                                                 | NS                | NS                         | NS          |
| <i>Pscd2</i>         | Pleckstrin homology, Sec7 and coiled-coil domain 2      | NS                                                 | 0.031             | NS                         | NS          |
| <i>Kcnj14</i> *      | Potassium inwardly-rectifying channel J14               | 1.96E-14                                           | <0.0001           | 21.6†                      | n/a         |
| <i>Grwd1</i>         | Glutamate-rich WD repeat containing 1                   | NS                                                 | NS                | NS                         | n/a         |
| <i>Grin2d</i>        | Glutamate receptor, ionotropic, NMDA2D (epsilon 4)      | NS                                                 | NS                | NS                         | NS          |
| <i>Kdelr1</i>        | KDEL endoplasmic reticulum protein retention receptor 1 | NS                                                 | 0.0454            | 2.1                        | NS          |
| <i>Syng4</i>         | Synaptogyrin 4                                          | NS                                                 | NS                | NS                         | NS          |
| 2310076021Rik*       | Riken cDNA 2310076021 gene                              | 1.75E-15                                           | <0.0001           | 33.4†                      | NS          |
| <i>Emp3</i>          | Epithelial membrane protein-3                           | NS                                                 | NS                | NS                         | 2.7         |
| <i>BC013491</i>      | cDNA sequence BC013491                                  | NS                                                 | NS                | NS                         | n/a         |
| <b><i>Abcc6</i>*</b> | <b>ATP-binding cassette, subfamily C, member 6</b>      | <b>5.57E-26</b>                                    | <b>&lt;0.0001</b> | <b>65.2†</b>               | <b>6.1†</b> |
| <i>Nomo1</i>         | Nodal modulator 1                                       | NS                                                 | NS                | NS                         | n/a         |
| <i>Kcnj11</i>        | ATP-sensitive inward rectifier potassium channel 11     | NS                                                 | NS                | NS                         | NS          |
| <i>Abcc8</i>         | ATP-binding cassette, subfamily C, member 8             | NS                                                 | NS                | NS                         | NS          |
| <i>Ush1c</i>         | Harmonin (Usher syndrome 1C protein homolog)            | NS                                                 | NS                | NS                         | NS          |
| <i>Q8CB92</i>        | n/a                                                     | n/a                                                | n/a               | n/a                        | n/a         |
| <i>Otog</i>          | Otogelin                                                | NS                                                 | NS                | NS                         | NS          |

Genes are listed in order of chromosomal location on Chromosome 7. Using the BxH cross generated on an apoE null background (BxH.apoE<sup>-/-</sup>), we compared F<sub>2</sub> mice with B6 homozygous genotype (B6.apoE<sup>-/-</sup>, N = 71) and C3H homozygous genotype (C3H.apoE<sup>-/-</sup>, N = 79) at the *Abcc6* locus, 12 and 15 genes showed significantly ( $P < 0.05$ ) differential expression using nonparametric Wilcoxon test and Student's *t* test, respectively. After Bonferroni correction, 10 genes remained significant for both analyses, as indicated (\*). Significant *P* values for the two analyses are shown. Logarithm of the odds (lod) scores for genes showing a *cis*-eQTL lod score of  $> 2.0$  are shown. Lod scores  $> 4.3$  (†) are considered significant for each cross. NS, not significant; n/a, not represented on the microarray chip.
