# Supplementary material
Source: PubMed Central journal article supplement (PMC1838635)
Supplement: pnas_0607620104_9.pdf [file pnas_0607620104_9.pdf]

**Table 3. Primer sequences used in the study**

| Name       | Primer | Sequence                  | C3H product (bp) | Polymorphism | Description                              |
|------------|--------|---------------------------|------------------|--------------|------------------------------------------|
| D7Dys1     | F      | TCCTCCGCCTCCTGATTATTC     | 270              | D<C<B6       | 38.51 Mb<br>(Location on Chr. 7)         |
|            | R      | AGTCTGTGGCTTGGGGTCTCT     |                  |              |                                          |
| D7Dys2     | F      | ATACAAGAGGGCTGGTGACG      | 215              | D=C<B6       | 39.17 Mb<br>(Location on Chr. 7)         |
|            | R      | TGTGAATGAGTGTGCGTATGT     |                  |              |                                          |
| D7Dys3     | F      | GCAATGAAAGAGGCAAGGTC      | 408              | B6<D=C       | 41.87 Mb<br>(Location on Chr. 7)         |
|            | R      | AATGAACAAGGCAAGAAATG      |                  |              |                                          |
| D7Dys4     | F      | GAGTATGTTTGAGGGTGGTT      | 265              | D=C<B6       | 43.07 Mb<br>(Location on Chr. 7)         |
|            | R      | AGTTAGAAGGCAGAGGAGAG      |                  |              |                                          |
| D7Dys5     | F      | CTGGGTTTGCTTGTTTC         | 188              | C<D=B6       | 40.30 Mb<br>(Location on Chr. 7)         |
|            | R      | AGTATGAGGTGGCTGGTC        |                  |              |                                          |
| D7Dys6     | F      | CCCTCACCCAATCATCAGA       | 293              | B10=D=C<B6   | 40.32 Mb<br>(Location on Chr. 7)         |
|            | R      | AGGATTTGCTATTCGTTTCG      |                  |              |                                          |
| D7Dys7     | F      | ATCCATTTCTGCCTTTAG        | 244              | B6<C         | 41.02 Mb<br>(Location on Chr. 7)         |
|            | R      | TTTGTCTTGTCCTGTGCT        |                  |              |                                          |
| D7Dys11    | F      | GTCCTGCAGTGACTCCATATGCTG  | 192              | B6<D=C       | 39.56 Mb<br>(Location on Chr. 7)         |
|            | R      | CTATCTCCTCCCAGTCCCTCCCTTC |                  |              |                                          |
| D7Dys26    | F      | TTCTGTGCCACGAATGCTACCTG   | 330              | C<B6=B10     | 40.40 Mb<br>(Location on Chr. 7)         |
|            | R      | CCTGAGCAATGGCACTTTCCTATG  |                  |              |                                          |
| D7Dys43    | F      | GTTCAAGTGAAGACCCTGCCTC    | 169              | B6=B10<C     | 40.05Mb<br>Intron 29 of <i>Abcc6</i>     |
|            | R      | TGTTGGCACTGATCTCAGATTTG   |                  |              |                                          |
| D7Dys44    | F      | GGACTCTCAGCCTTTGAACTG     | 318              | B6=B10<C     | 40.08Mb<br>Intron 19 of <i>Abcc6</i>     |
|            | R      | GGACAGCCAGGGCTATAGAG      |                  |              |                                          |
| D7Dys45    | F      | ATCCTGCAAGTTACCCTCTG      | 286              | C<B6=B10     | 40.14Mb<br>29kb 5' of <i>Abcc6</i> Exon1 |
|            | R      | GCAGGAAGAGACAAGACCAC      |                  |              |                                          |
| D7Seq3UTR  | F      | TGGAGCGCTGGTTTACACAG      | 628              | C<B6=B10     | 40.12Mb<br>3'-UTR of <i>Abcc6</i>        |
|            | R      | GGAGTTGTAAAGACGAGTCGGTC   |                  |              |                                          |
| Abcc6Qpcr  | F      | GACTGTGCCAGAGTCCTAGTCATG  | 138              | D=H<B6=B10   | 40.06Mb<br>Exon 30-31 of <i>Abcc6</i>    |
|            | R      | GTTGGTAAGAATCCTTATTCAAGCG |                  |              |                                          |
| BactinQpcr | F      | CTTGGGTATGGAATCCTGTGG     | 134              | n/a          | Beta-actin                               |
|            | R      | CAGCAATGCCTGGGTACATG      |                  |              |                                          |

|            |   |                           |     |     |                               |
|------------|---|---------------------------|-----|-----|-------------------------------|
| AnkQpcr    | F | CTACAGAGGCAGTGGCCATTCTG   | 145 | n/a | <i>Ank</i>                    |
|            | R | GTGACCGTGTTGCTTGTGTTTCG   |     |     |                               |
| Akp2Qpcr   | F | AGGGCAATGAGGTACATCC       | 150 | n/a | <i>Akp2</i>                   |
|            | R | GCATCTCGTTATCCGAGTACCAG   |     |     | (Primer Bank # 6671533a3)     |
| Spp1Qpcr   | F | TAGCTTGGCTTATGGACTGAGG    | 112 | n/a | <i>Spp1</i>                   |
|            | R | AGACTCACCGCTCTTCATGTG     |     |     | (Primer Bank # 6678113a3)     |
| Enpp1Qpcr  | F | CTGGTTTTGTCAGTATGTGTGCT   | 231 | n/a | <i>Enpp1</i>                  |
|            | R | CTCACCGCACCTGAATTTGTT     |     |     |                               |
| Dkk1Qpcr   | F | CTCATCAATTCCAACGCGATCA    | 105 | n/a | <i>Dkk1</i>                   |
|            | R | GCCCTCATAGAGAACTCCCG      |     |     |                               |
| Dkk2Qpcr   | F | CACACTCCAAGATGCCTCATATAAA | 78  | n/a | <i>Dkk2</i>                   |
|            | R | AAAACCCATCAATGCAGTCTGA    |     |     | (Towler <i>et al.</i> , 2003) |
| LRP5Qpcr   | F | AAGGGTGCTGTGTACTGGAC      | 220 | n/a | <i>LRP5</i>                   |
|            | R | AGAAGAGAACCTTACGGGACG     |     |     |                               |
| LRP6Qpcr   | F | GGCTGGCATGTGATTGGCT       | 130 | n/a | <i>LRP6</i>                   |
|            | R | GCTCTGGGTTGATCCAACCTCT    |     |     | (Primer Bank # 6678718a2)     |
| Ctnnb1Qpcr | F | ATGGAGCCGGACAGAAAAGC      | 108 | n/a | <i>Ctnnb1</i>                 |
|            | R | CTTGCCACTCAGGGAAGGA       |     |     | (Primer Bank # 6671684a1)     |
| BMP2Qpcr   | F | GGGACCCGCTGTCTTCTAGT      | 154 | n/a | <i>BMP2</i>                   |
|            | R | TCAACTCAAATTCGCTGAGGAC    |     |     |                               |
| Msx2Qpcr   | F | TTCACCACATCCCAGCTTCTA     | 159 | n/a | <i>Msx2</i>                   |
|            | R | TTGCAGTCTTTTCGCCTTAGC     |     |     |                               |
| Smad6Qpcr  | F | CCGGGTGAATTCTCAGATGCC     | 131 | n/a | <i>Smad6</i>                  |
|            | R | ATGCTGACAGCCTGGTCGTACAC   |     |     |                               |

A total of 12 new microsatellite markers polymorphic between C3H and B6 were identified in the *Dyscalc1* region. Map locations are taken from NCBI build 34. Also shown are primer sequences used for genotyping the transgene and for determining the 10-bp deletion in the 3'-UTR of *Abcc6* genomic sequence and QPCR primers used for selected genes. F, forward; R, reverse; H, C3H; D, DBA; B6, C57BL/6J; B10, C57BL/10J. Primers obtained from the Primer bank (<http://pga.mgh.harvard.edu/primerbank>) (1) and published literature (2) are indicated.

1. Wang X, Seed B (2003) *Nucleic Acids Research* 31: 1-8.
2. Cheng SL, Shao JS, Charlton-Kachigian N, Loewy AP, Towler DA (2003) *J Biol Chem.* 278: 45969-45977.
