# Supplementary material
Source: PubMed Central journal article supplement (PMC1838635)
Supplement: pnas_0607620104_10.pdf [file pnas_0607620104_10.pdf]

**Table 4. Sequence variations identified in the 31 exons of the *Abcc6* gene in strains C3H and DBA compared to B6 (GenBank accession nos. EF109740 and EF 109741)**

| SNP position (bp) | Exon          | Nucleotide change (B/D/H)        | Amino acid (position: B/D/H) |
|-------------------|---------------|----------------------------------|------------------------------|
| 47                | 1             | C/T/T                            | 14:C/C/C                     |
| <b>88</b>         | <b>2</b>      | <b>C/T/T</b>                     | <b>28:A/V/V</b>              |
| 116               | 2             | T/C/C                            | 37:F/F/F                     |
| <b>288</b>        | <b>3</b>      | <b>G/A/A</b>                     | <b>95:V/M/M</b>              |
| 385               | 4             | T/T/A                            | 127:L/Q/L                    |
| <b>417</b>        | <b>4</b>      | <b>T/G/G</b>                     | <b>138:S/A/A</b>             |
| <b>456</b>        | <b>4</b>      | <b>A/G/G</b>                     | <b>151:I/V/V</b>             |
| 696               | 7             | A/A/G                            | 231:R/G/R                    |
| 1034              | 9             | G/A/A                            | 343:S/S/S                    |
| 1184              | 10            | C/T/T                            | 393:V/V/V                    |
| 1250              | 10            | C/T/T                            | 415:I/I/I                    |
| 1289              | 10            | G/A/A                            | 428:G/G/G                    |
| 1298              | 10            | C/T/C                            | 431:L/L/L                    |
| 1588              | 12            | T/T/C                            | 528:L/L/P                    |
| 1719              | 13            | G/G/T                            | 572:V/V/L                    |
| <b>1866</b>       | <b>14</b>     | <b>C/T/T</b>                     | <b>621:R/C/C</b>             |
| 2081              | 17            | T/C/C                            | 692:A/A/A                    |
| <b>2122</b>       | <b>17</b>     | <b>T/C/C</b>                     | <b>706:V/A/A</b>             |
| 2180              | 17            | T/C/C                            | 725:D/D/D                    |
| 2297              | 18            | T/C/C                            | 764:A/A/A                    |
| <b>2305</b>       | <b>18</b>     | <b>A/G/G</b>                     | <b>767:K/R/R</b>             |
| 2521              | 19            | T/T/C                            | 839:L/L/P                    |
| <b>2785</b>       | <b>22</b>     | <b>C/T/T</b>                     | <b>927:T/I/I</b>             |
| 3077              | 23            | T/A/A                            | 1024:A/A/A                   |
| 3178              | 23            | T/A/T                            | 1058:L/Q/L                   |
| 3197              | 23            | T/C/C                            | 1064:Y/Y/Y                   |
| 3218              | 23            | C/T/T                            | 1071:V/V/V                   |
| <b>4107</b>       | <b>29</b>     | <b>G/A/A</b>                     | <b>1368:A/T/T</b>            |
| 4114              | 29            | T/T/C                            | 1370:L/L/P                   |
| 4355              | 30            | T/C/C                            | 1450:L/L/L                   |
| 4357              | 30            | T/C/T                            | 1451:I/T/I                   |
| 4388              | 30            | T/C/C                            | 1461:C/C/C                   |
| 4433              | 31            | C/T/C                            | 1476:G/G/G                   |
| <b>4505</b>       | <b>3'-UTR</b> | <b>A/G/G</b>                     | —                            |
| <b>4515</b>       | <b>3'-UTR</b> | <b>A/T/T</b>                     | —                            |
| <b>4925-4934</b>  | <b>3'-UTR</b> | <b>10-bp deletion in D and H</b> | —                            |

Sequencing data from DBA and C3H strains were compared with public sequence from Ensembl (<http://www.ensembl.org>), and National Center for Biotechnology Information (NCBI) (<http://www.ncbi.nlm.nih.gov>). SNPs resulting in amino acid changes or variations in 3'-UTR in both the DBA and C3H strains are in bold letters. B, B6; D, DBA; H, C3H.
