# Supplementary material
Source: PubMed Central journal article supplement (PMC1838635)
Supplement: pnas_0607620104_11.pdf [file pnas_0607620104_11.pdf]

**Table 5. A list of 32 genes involved in vascular calcification regulation was examined for correlation with *Abcc6* expression level in liver tissue from the BxD and BxH intercrosses**

| Gene             | <i>Abcc6</i> |                 |                         |                 | Gene description                                                         |
|------------------|--------------|-----------------|-------------------------|-----------------|--------------------------------------------------------------------------|
|                  | BxD          |                 | BxH.apoE <sup>-/-</sup> |                 |                                                                          |
|                  | r-Pearson    | Pp              | r-Pearson               | Pp              |                                                                          |
| <i>Spp1</i> *    | -0.555       | <b>2.62E-10</b> | -0.283                  | <b>4.01E-07</b> | Osteopontin (OPN)                                                        |
| <i>Spp2</i>      | 0.456        | <b>5.03E-07</b> | 0.177                   | <b>0.0018</b>   | Secreted phosphoprotein 2                                                |
| <i>Enpp1</i> *   | 0.453        | <b>6.05E-07</b> | 0.251                   | <b>7.24E-06</b> | Ectonucleotide pyrophosphatase/phosphodiesterase 1 (NPP1)                |
| <i>Tnfrsf11a</i> | 0.431        | <b>2.33E-06</b> | 0.136                   | <b>0.0161</b>   | Tumor necrosis factor receptor superfamily, member 11a (RANK)            |
| <i>Akp2</i>      | 0.292        | <b>0.0019</b>   | -0.132                  | <b>0.0201</b>   | Alkaline phosphatase 2 (TNAP)                                            |
| <i>Runx2</i>     | -0.281       | <b>0.0028</b>   | -0.138                  | <b>0.0156</b>   | Runt related transcription factor 2 (Cbfa1)                              |
| <i>Smad6</i>     | -0.218       | <b>0.0217</b>   | 0.12                    | <b>0.0348</b>   | MAD homolog 6                                                            |
| <i>Ggcx</i>      | 0.584        | <b>1.72E-11</b> | 0.115                   | 0.0507          | Gamma-glutamyl carboxylase                                               |
| <i>Sparc</i>     | -0.575       | <b>4.23E-11</b> | -0.062                  | 0.2918          | Secreted acidic cysteine rich glycoprotein (Osteonectin)                 |
| <i>Vkorc1</i>    | 0.566        | <b>9.95E-11</b> | -0.07                   | 0.2181          | Vitamin K epoxide reductase complex, subunit 1                           |
| <i>Fbn1</i>      | -0.543       | <b>7.42E-10</b> | -0.04                   | 0.4873          | Fibrillin 1                                                              |
| <i>Ctnnb1</i>    | -0.493       | <b>3.90E-08</b> | -0.105                  | 0.0634          | Beta-catenin                                                             |
| <i>Dcn</i>       | -0.396       | <b>1.71E-05</b> | -0.071                  | 0.2131          | Decorin                                                                  |
| <i>Ank</i>       | 0.396        | <b>1.72E-05</b> | 0.022                   | 0.7031          | Progressive ankylosis                                                    |
| <i>Slc20a1</i>   | -0.374       | <b>5.19E-05</b> | -0.033                  | 0.5605          | Solute carrier family 20, member 1 (Phosphate transporter)               |
| <i>Tnfrsf11b</i> | -0.178       | 0.0611          | -0.049                  | 0.3853          | Tumor necrosis factor receptor superfamily, member 11b (Osteoprotegerin) |
| <i>Bmpr2</i>     | 0.16         | 0.0942          | -0.06                   | 0.295           | Bone morphogenic protein receptor, type II                               |
| <i>Car2</i>      | -0.095       | 0.3203          | 0.075                   | 0.1906          | Carbonic anhydrase 2                                                     |
| <i>Msx1</i>      | -0.055       | 0.5734          | -0.056                  | 0.3229          | Homeo box, msh-like 1                                                    |
| <i>Bmp4</i>      | -0.053       | 0.5783          | -0.065                  | 0.2571          | Bone morphogenetic protein 4                                             |
| <i>Slc20a2</i>   | -0.05        | 0.6279          | 0.135                   | <b>0.0168</b>   | Solute carrier family 20, member 2 (Phosphate transporter)               |
| <i>Bmp2</i>      | -0.046       | 0.6322          | 0.073                   | 0.1971          | Bone morphogenetic protein 2                                             |
| <i>Msx2</i>      | -0.047       | 0.6445          | 0.044                   | 0.44            | Homeo box, msh-like 2                                                    |
| <i>Ahsg</i>      | 0.041        | 0.6657          | 0.31                    | <b>0.0007</b>   | Alpha-2-HS-glycoprotein (Fetuin A)                                       |
| <i>Kl</i>        | -0.042       | 0.666           | -0.052                  | 0.3584          | Klotho                                                                   |
| <i>Tnfrsf11</i>  | 0.043        | 0.6842          | -0.022                  | 0.7033          | Tumor necrosis factor (ligand) superfamily, member 11 (RANKL)            |
| <i>Pthlh</i>     | 0.024        | 0.8053          | -0.112                  | 0.0507          | Parathyroid hormone-like peptide                                         |
| <i>Cyp27b1</i>   | n/a          | n/a             | 0.104                   | 0.0667          | 25-hydroxyvitamin D3 1 alpha-hydroxylase (Vdd1)                          |
| <i>Sp7</i>       | n/a          | n/a             | 0.056                   | 0.3226          | Trans-acting transcription factor 7 (Osterix)                            |
| <i>Sox9</i>      | n/a          | n/a             | -0.044                  | 0.4452          | SRY-box containing gene 9                                                |
| <i>MGP</i>       | n/a          | n/a             | -0.024                  | 0.6732          | Matrix Gla protein                                                       |
| <i>Bglap1</i>    | n/a          | n/a             | -0.001                  | 0.9805          | Bone gamma carboxyglutamate protein 1 (Osteocalcin)                      |

Correlation coefficient (r) and *P* value for Pearson (*Pp*) analyses are shown. Significant *P* values (*P* < 0.05) and genes with significant *P* values in both crosses are in bold letters. Genes with statistical significant correlation with *Abcc6* expression after Bonferroni multiple test correction are indicated (\*). n/a, not represented on the microarray chip.
