# Supplementary material
Source: PubMed Central journal article supplement (PMC1838635)
Supplement: pnas_0607620104_12.pdf [file pnas_0607620104_12.pdf]

**Table 6. Correlation of genes involved in vascular calcification regulation and the BMP2-Wnt pathway with *Abcc6* expression in skeletal muscle from the BxH intercross**

| Gene               | <i>Abcc6</i> correlation |                 |                    |                   |
|--------------------|--------------------------|-----------------|--------------------|-------------------|
|                    | <i>r</i> -Pearson        | <i>Pp</i>       | <i>r</i> -Spearman | <i>Ps</i>         |
| <i>Tnfa</i> *      | -0.5660                  | <b>2.07E-28</b> | -0.3941            | <b>2.70E-13</b>   |
| <i>Akp2</i> *      | 0.5296                   | <b>1.85E-24</b> | 0.4372             | <b>2.54E-16</b>   |
| <i>Enpp1</i> *     | -0.5147                  | <b>5.57E-23</b> | -0.3548            | <b>6.76E-11</b>   |
| <i>Slc20a1</i> *   | -0.4834                  | <b>4.41E-20</b> | -0.3798            | <b>2.21E-12</b>   |
| <i>Tnfsf11</i> *   | -0.4646                  | <b>1.73E-18</b> | -0.3763            | <b>3.61E-12</b>   |
| <i>Slc20a2</i> *   | 0.4527                   | <b>1.59E-17</b> | 0.3923             | <b>3.49E-13</b>   |
| <i>Smad6</i> *     | 0.3672                   | <b>1.28E-11</b> | 0.3423             | <b>3.39E-10</b>   |
| <i>Ank</i> *       | 0.3552                   | <b>6.45E-11</b> | 0.3084             | <b>1.86E-08</b>   |
| <i>Vkorc1</i> *    | 0.3544                   | <b>7.13E-11</b> | 0.3504             | <b>1.20E-10</b>   |
| <i>Sparc</i> *     | -0.3393                  | <b>4.94E-10</b> | -0.3352            | <b>8.13E-10</b>   |
| <i>Sp7</i> *       | 0.3268                   | <b>2.25E-09</b> | 0.3367             | <b>6.79E-10</b>   |
| <i>Tnfrsf11b</i> * | 0.3218                   | <b>4.07E-09</b> | 0.3161             | <b>7.79E-09</b>   |
| <i>Cyp27b1</i> *   | 0.3216                   | <b>4.14E-09</b> | 0.3188             | <b>5.73E-09</b>   |
| <i>Lrp6</i> *      | 0.3162                   | <b>7.73E-09</b> | 0.2713             | <b>8.68E-07</b>   |
| <i>Bmpr2</i> *     | 0.3145                   | <b>9.43E-09</b> | 0.2864             | <b>1.95E-07</b>   |
| <i>Wnt3a</i> *     | 0.3084                   | <b>1.87E-08</b> | 0.2444             | <b>1.01E-05</b>   |
| <i>Lrp5</i> *      | 0.2747                   | <b>6.26E-07</b> | 0.2860             | <b>2.03E-07</b>   |
| <i>Sfrp1</i> *     | -0.2664                  | <b>1.38E-06</b> | -0.2447            | <b>9.86E-06</b>   |
| <i>Tnfrsf11a</i>   | 0.2568                   | <b>3.38E-06</b> | 0.2798             | <b>3.79E-07</b>   |
| <i>Wnt7a</i> *     | 0.2433                   | <b>1.11E-05</b> | 0.2573             | <b>3.23E-06</b>   |
| <i>Msx2</i> *      | 0.2118                   | <b>0.0001</b>   | 0.2141             | <b>0.0001</b>     |
| <i>Fbn1</i> *      | -0.2113                  | <b>0.0001</b>   | -0.1950            | <b>0.0005</b>     |
| <i>Dkk1</i> *      | 0.2112                   | <b>0.0001</b>   | 0.1923             | <b>0.0006</b>     |
| <i>Dcn</i>         | -0.1835                  | <b>0.0029</b>   | -0.1995            | <b>0.0012</b>     |
| <i>Bmp2</i>        | 0.1652                   | <b>0.0031</b>   | 0.1577             | <b>0.0047</b>     |
| <i>Msx1</i>        | -0.1582                  | <b>0.0046</b>   | -0.1316            | <b>0.0187</b>     |
| <i>Car2</i>        | 0.1547                   | <b>0.0056</b>   | 0.1635             | <b>0.0034</b>     |
| <i>Dkk2</i>        | 0.1416                   | <b>0.0114</b>   | 0.1184             | <b>0.0345</b>     |
| <i>Bglap1</i>      | 0.1409                   | <b>0.0118</b>   | 0.2840             | <b>&lt;0.0001</b> |
| <i>Wnt5b</i>       | 0.1301                   | <b>0.0201</b>   | 0.1267             | <b>0.0236</b>     |
| <i>Ctnnb1</i>      | 0.1276                   | <b>0.0226</b>   | 0.1035             | 0.0648            |
| <i>Spp1</i>        | -0.1138                  | <b>0.0423</b>   | -0.0959            | 0.0874            |
| <i>Kl</i>          | 0.0963                   | 0.0860          | 0.1181             | <b>0.0349</b>     |
| <i>Spp2</i>        | 0.0598                   | 0.2871          | 0.1143             | <b>0.0412</b>     |
| <i>Bmp4</i>        | 0.0994                   | 0.0762          | 0.0906             | 0.1064            |
| <i>Ahsg</i>        | 0.0614                   | 0.2745          | 0.0382             | 0.4962            |
| <i>Ggcx</i>        | 0.0527                   | 0.3486          | 0.0690             | 0.2197            |
| <i>Pthlh</i>       | 0.0477                   | 0.3959          | -0.0087            | 0.8768            |
| <i>Runx2</i>       | 0.0332                   | 0.5548          | 0.0360             | 0.5220            |
| <i>Sox9</i>        | 0.0188                   | 0.7401          | 0.0284             | 0.6150            |
| <i>Mglap</i>       | 0.0185                   | 0.7418          | 0.0424             | 0.4510            |

Correlation coefficient ( $r$ ) and  $P$  value for Pearson ( $P_p$ ) and nonparametric Spearman ( $P_s$ ) analyses are shown. Significant  $P$  values ( $P < 0.05$ ) and genes with significant  $P$  values in either Pearson or Spearman analyses are in bold letters. Genes with statistically significant correlation with *Abcc6* expression after Bonferroni multiple test correction are indicated (\*). *Tnfa*, tumor necrosis factor; *Lrp5*, low-density lipoprotein receptor-related protein 5; *Lrp6*, low-density lipoprotein receptor-related protein 6; *Sfrp1*, secreted frizzled-related protein 1; *Wnt3a*, wingless-related MMTV integration site 3A; *Wnt5b*, wingless-related MMTV integration site 5B; *Wnt7a*, wingless-related MMTV integration site 7A; *Dkk1*, dickkopf homolog 1; *Dkk2*, dickkopf homolog 1. For a description of other genes, see Table 5.
