# Supplementary material
Source: PubMed Central journal article supplement (PMC1838635)

A.

3' -UTR 

4925

4934

AGCATCACACCGACTCTGACCGACTCGTCTT

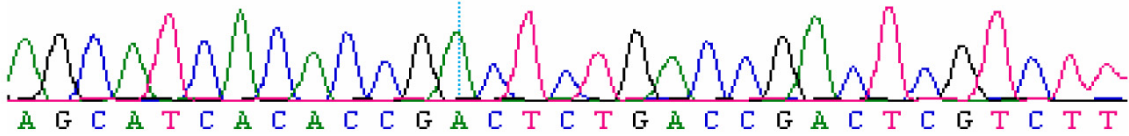

B6/B10

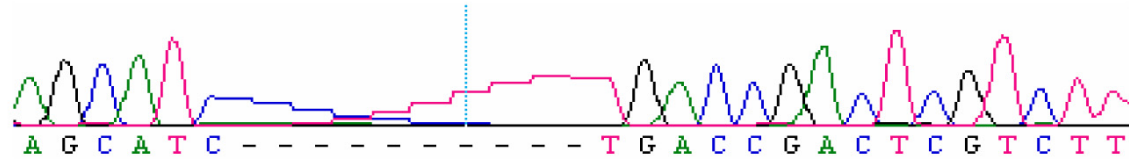

C3H/DBA

B.

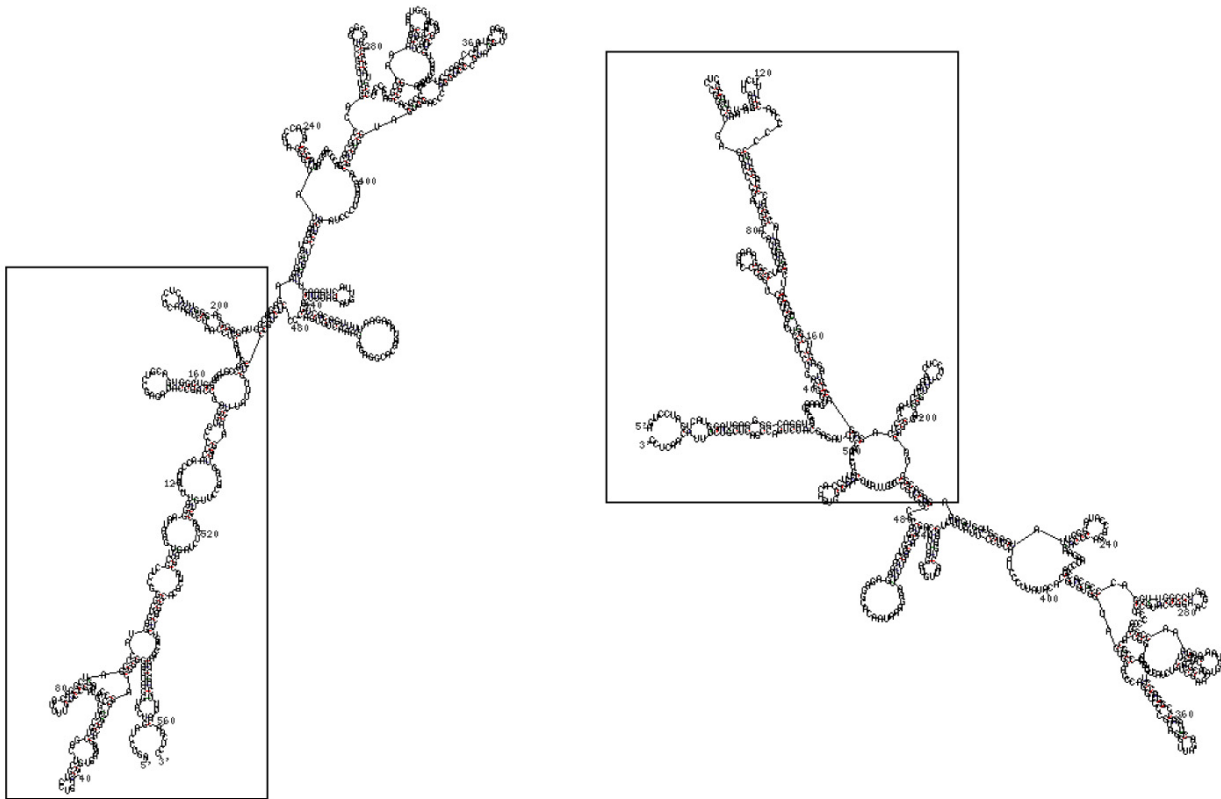

dG = -183.25 (B6 3' UTR)

dG = -179.21 (C3H 3' UTR)

Supplement: pnas_0607620104_2.pdf [file pnas_0607620104_2.pdf]

**A.**

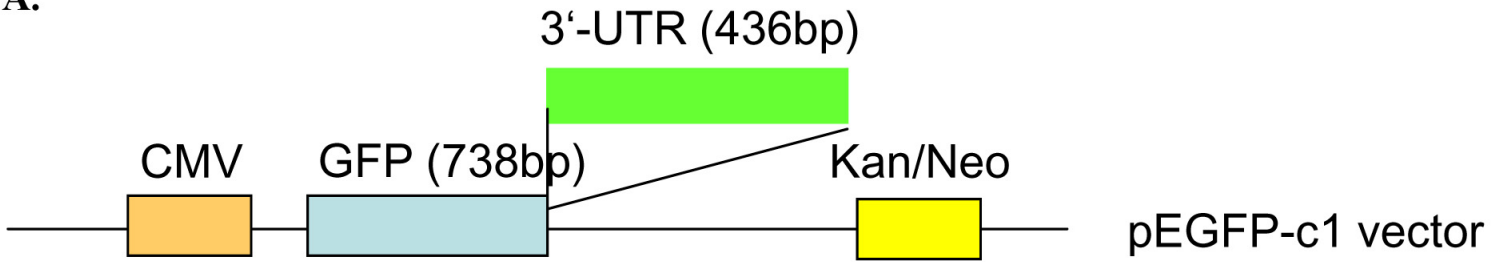

**B.**

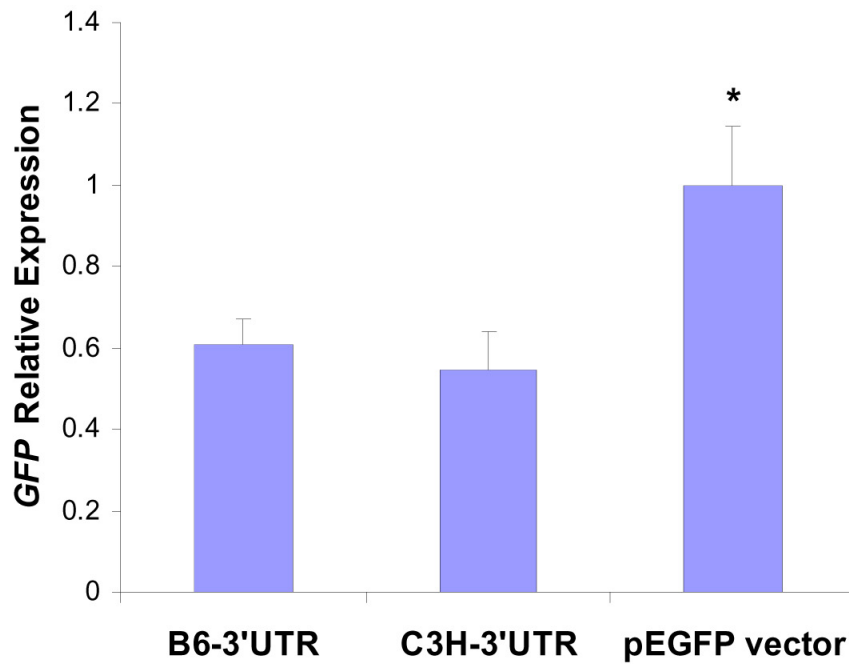

Supplement: pnas_0607620104_3.pdf [file pnas_0607620104_3.pdf]

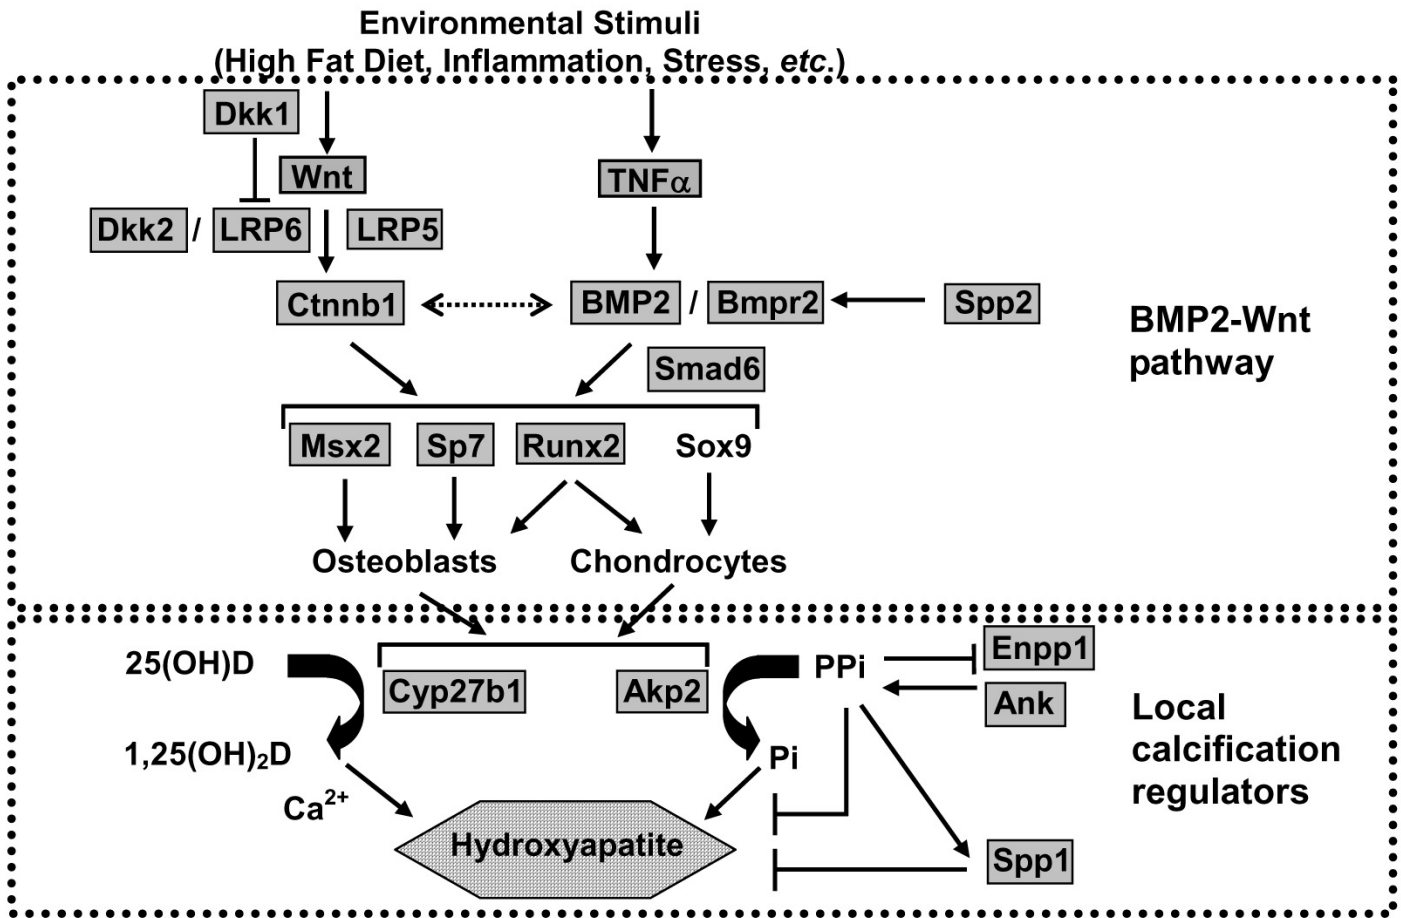

Supplement: pnas_0607620104_5.pdf [file pnas_0607620104_5.pdf]

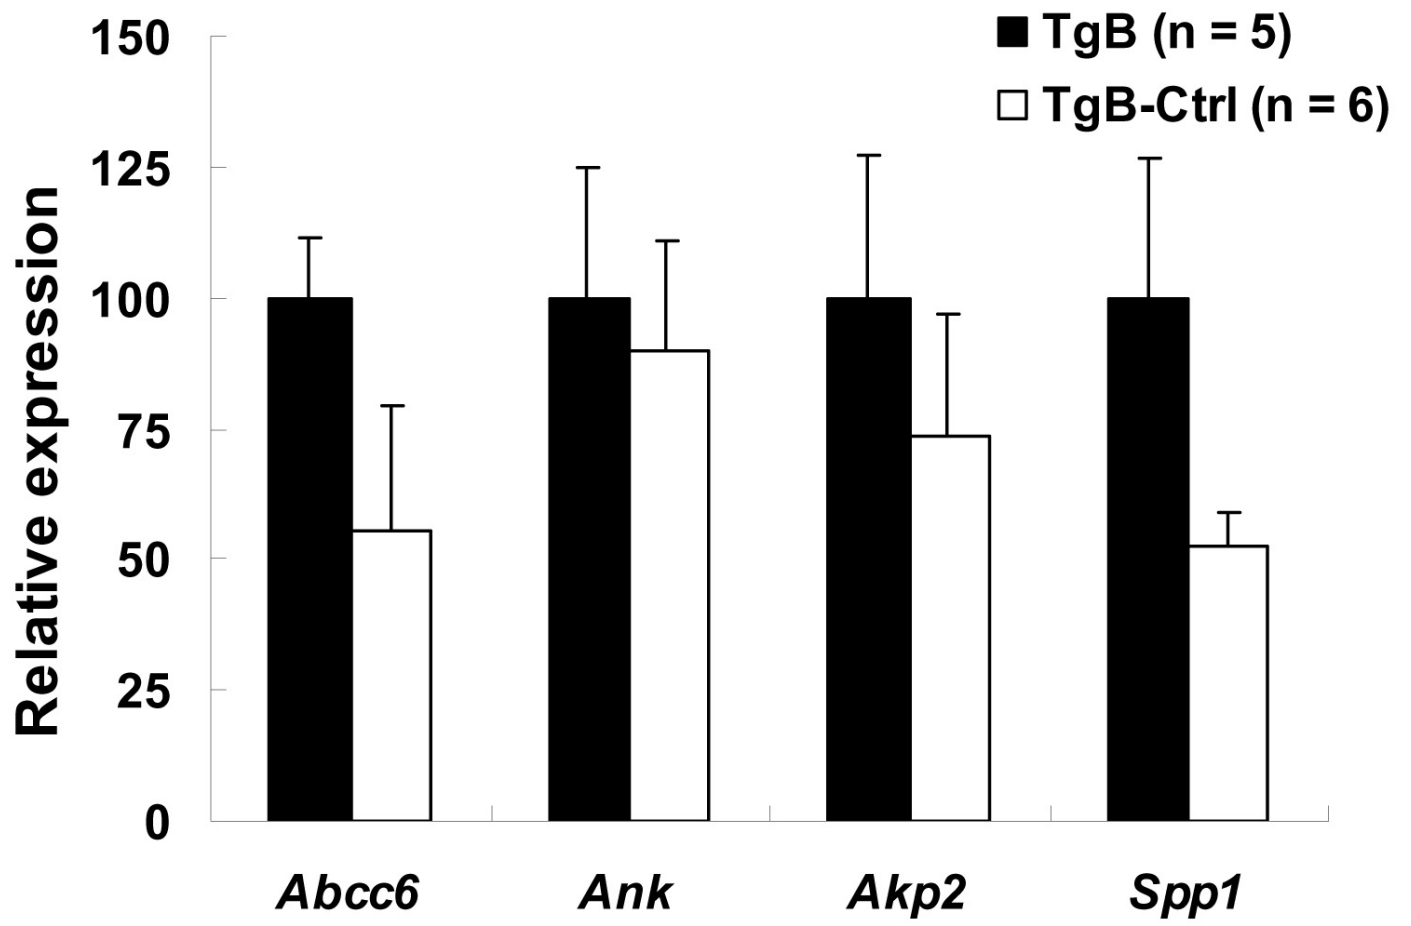

Supplement: pnas_0607620104_6.pdf [file pnas_0607620104_6.pdf]
